# Supplementary material for: Engineering of hierarchical NiCoSe2@NiMn-LDH core-shell nanostructures as a high-performance positive electrode material for hybrid supercapacitors
Source: Royal Society of Chemistry journal article supplement (doi:10.1039/d0se00909a), 2020-01-01
Supplement: d0se00909a1.pdf [file d0se00909a1.pdf]

## Supporting Information

# Engineering of Hierarchical NiCoSe<sub>2</sub>@NiMn-LDH Core-Shell Nanostructures as a High-Performance Positive Electrode Material for Hybrid Supercapacitors

Bahareh Ameri, Akbar Mohammadi Zardkhoshoui\* and Saied Saeed Hosseiny Davarani\*

Department of Chemistry, Shahid Beheshti University, G. C., 1983963113, Evin, Tehran, Iran.

Corresponding authors: \*Tel: +98 21 22431661; Fax: +98 21 22431661; E-mail: [ss-hosseiny@sbu.ac.ir](mailto:ss-hosseiny@sbu.ac.ir)

(S.S.H. Davarani); and [mohammadi.bahadoran@gmail.com](mailto:mohammadi.bahadoran@gmail.com) (A. Mohammadi Zardkhoshoui)

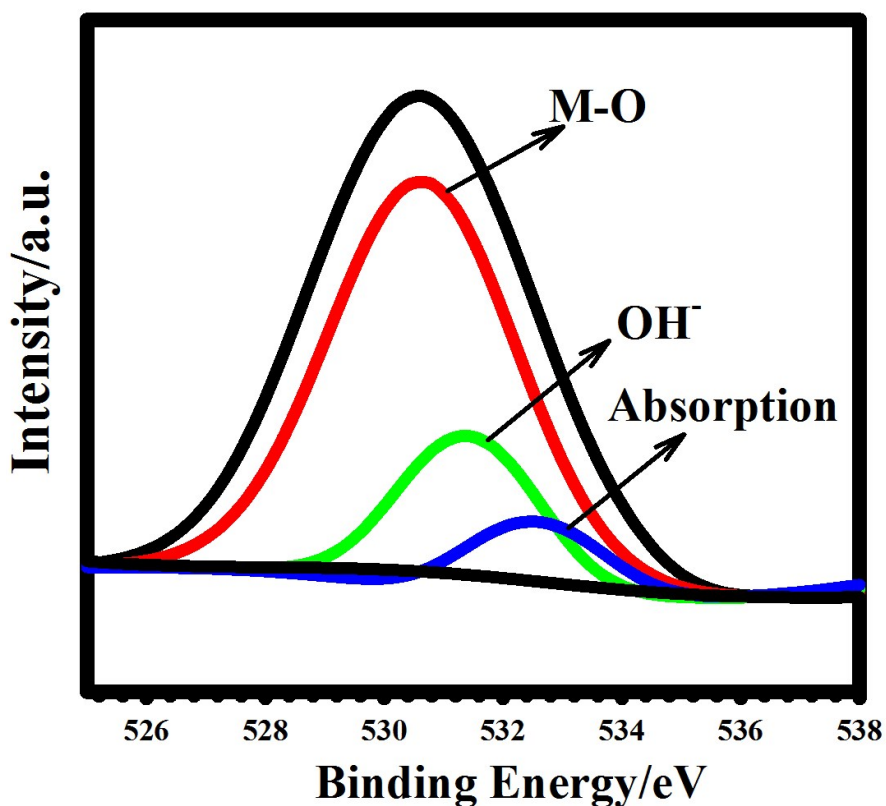

Fig. S1 XPS spectrum of the O 1s for NCSe@NMLDH sample.

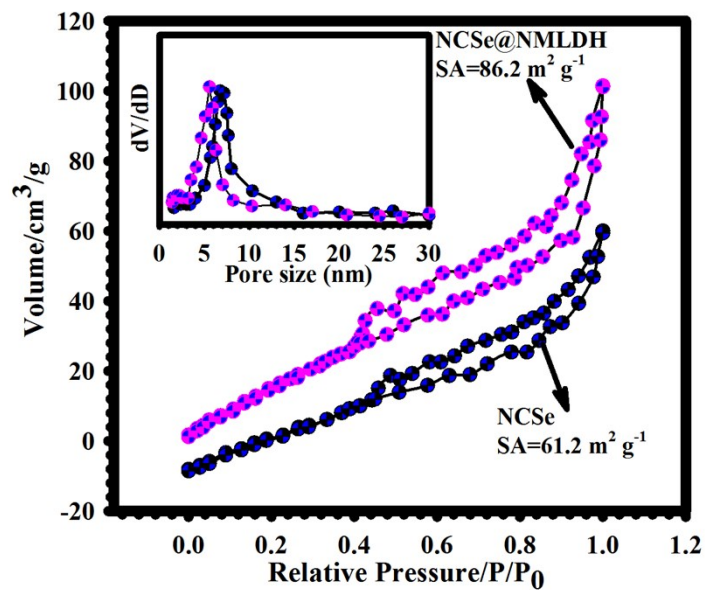

Fig. S2 BET curves of NCSe and NCSe@NMLDH and their corresponding BJH curve (inset).

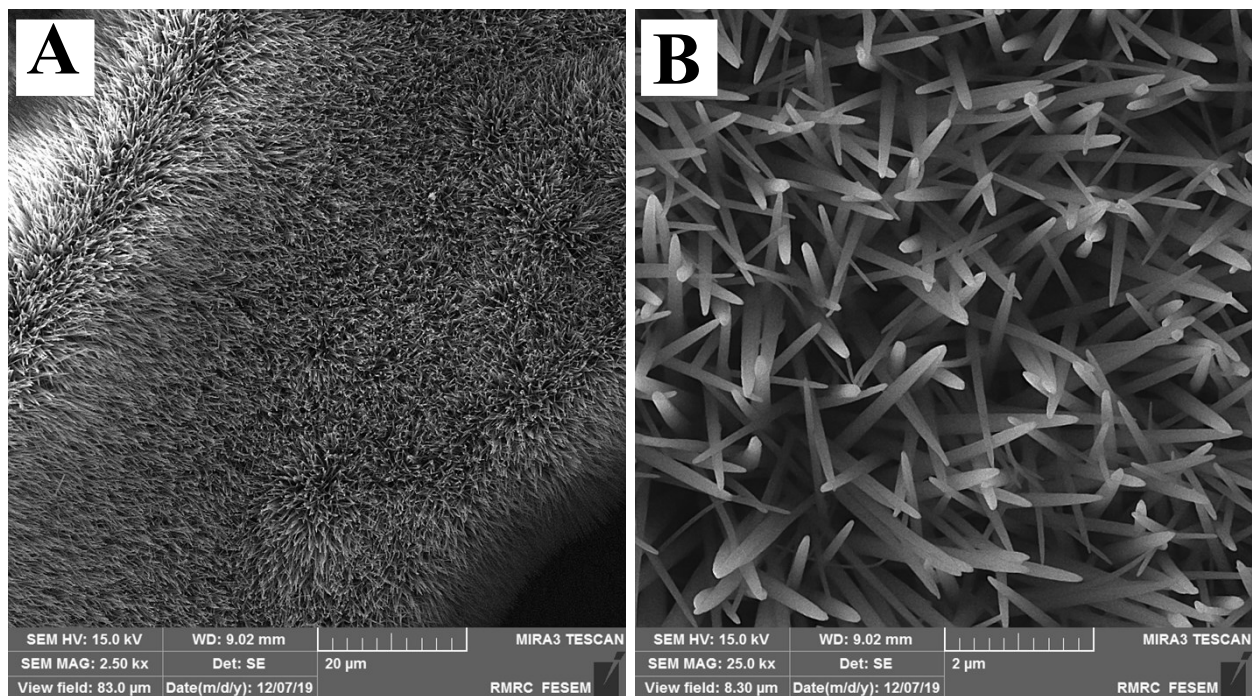

Fig. S3 (A, B) FE-SEM image of the Ni-Co-precursors.

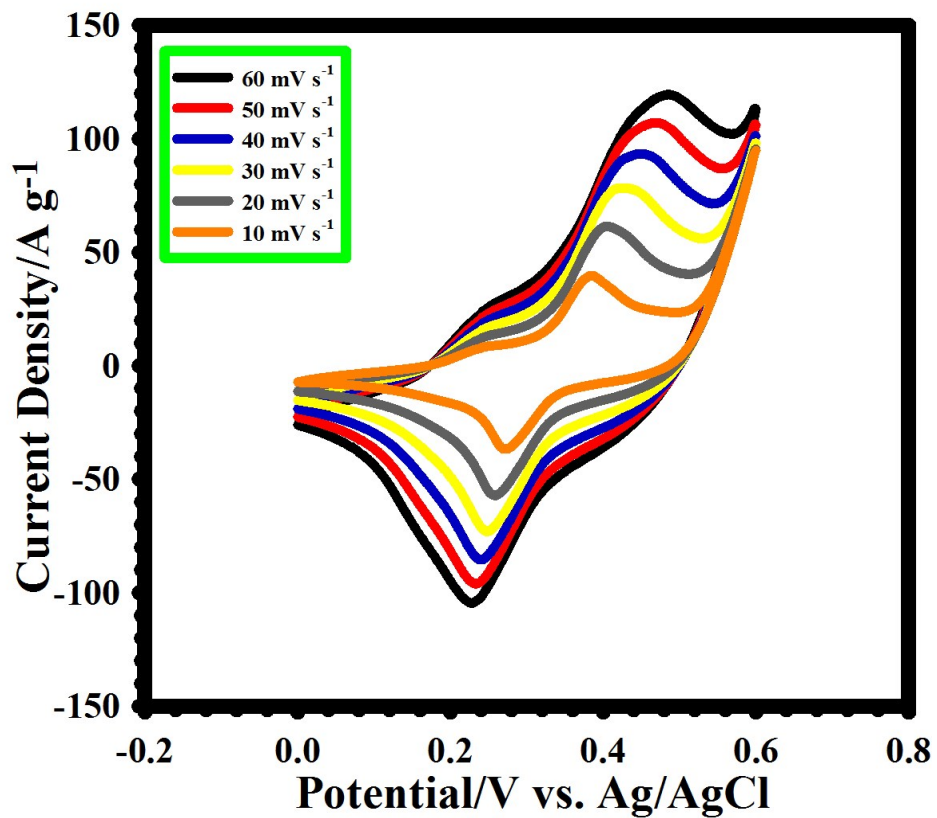

Fig .S4 CV curves of the NCSe/NF electrode at various scan rates.

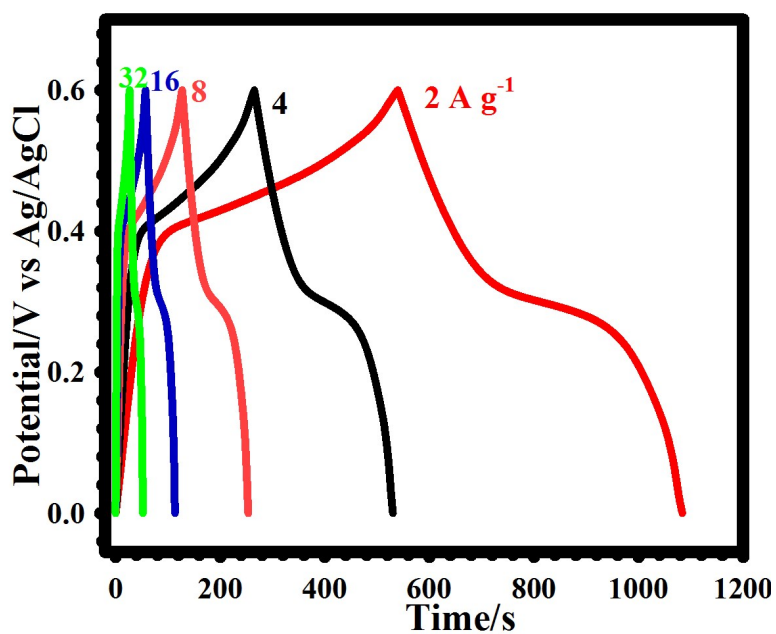

Fig. S5 GCD curves of the NCSe/NF electrode at various current densities.

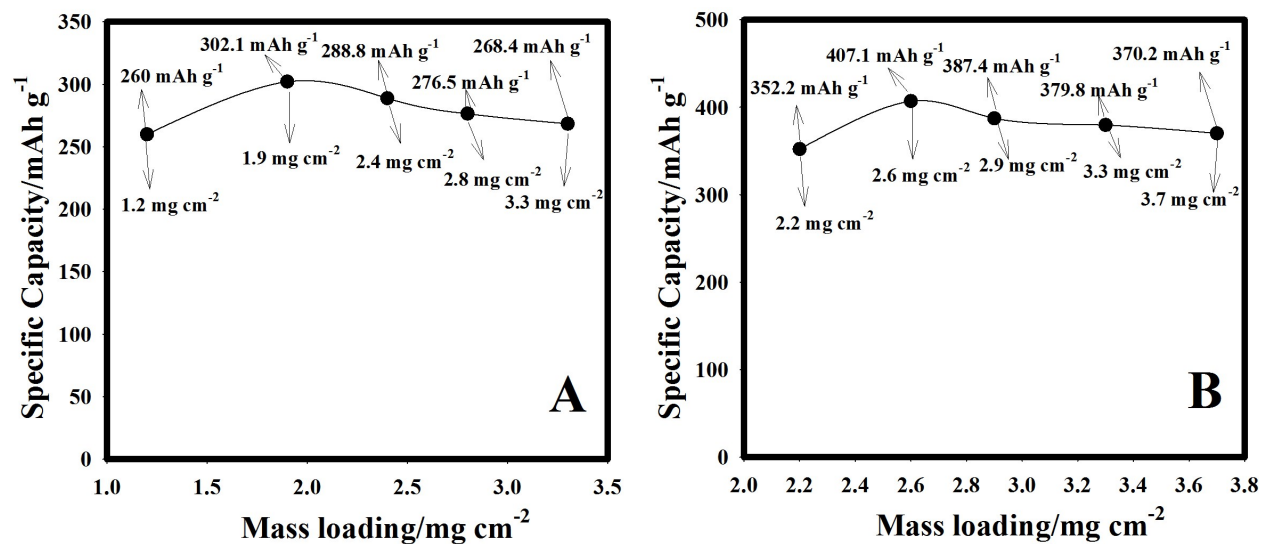

Fig. S6 (A) Specific capacity vs mass loading of NCSe (B) Specific capacity vs mass loading of NCSe@NMLDH.

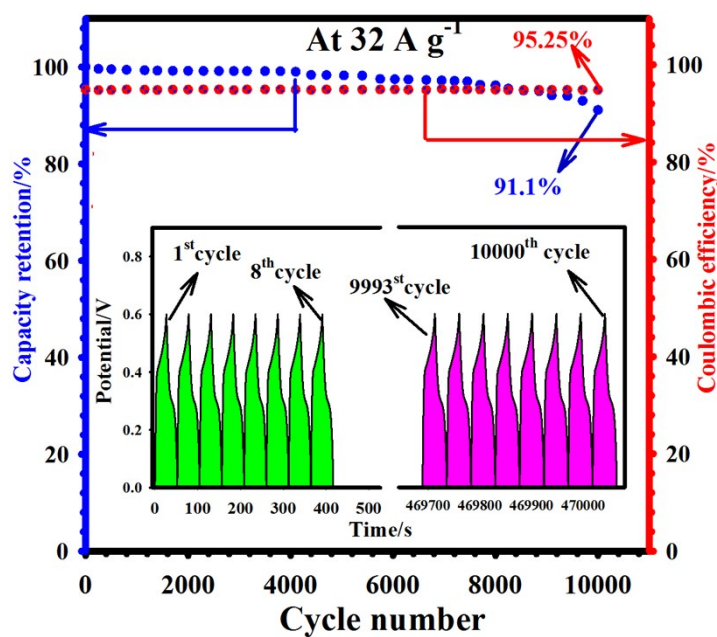

Fig. S7 The cyclability and Coulombic efficiency of the NCSe/NF electrode at  $32 \text{ A g}^{-1}$  (the inset shows the first and last eight GCD cycles).

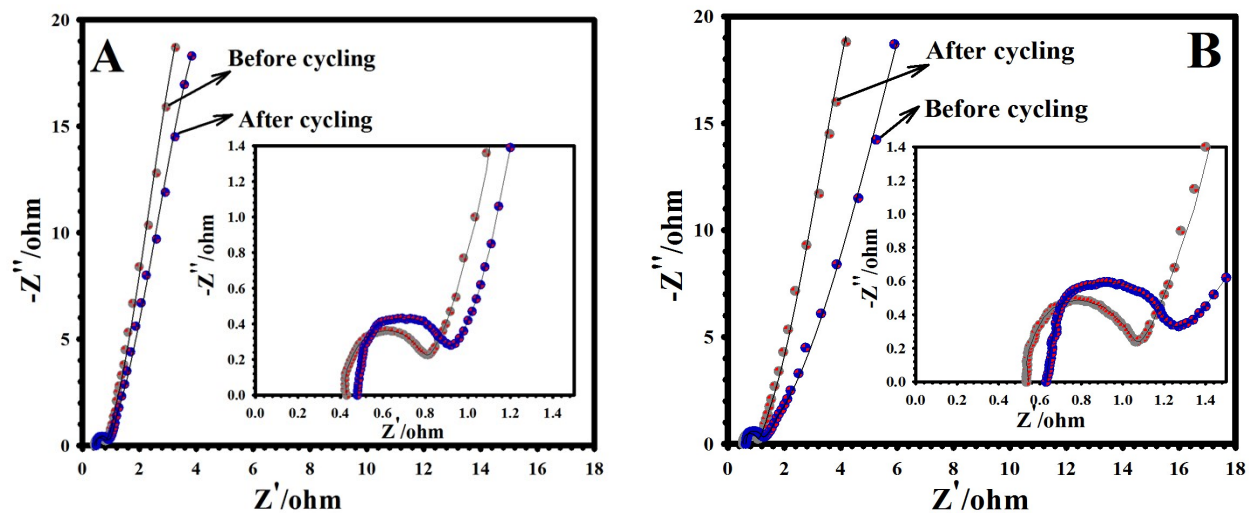

**Fig S8.** (A) Nyquist graphs of the NCS@NMLDH/NF before and after cycling. (B) Nyquist graphs of NCS/NF before and after cycling.

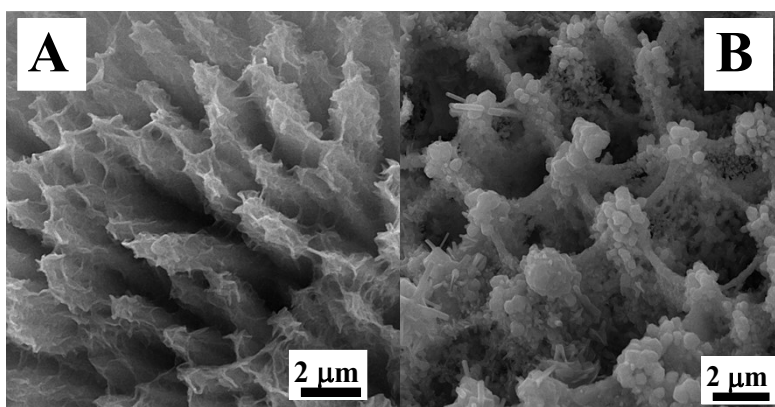

**Fig S9.** (A) FE-SEM image of the NCS/NF after cycling. (B) FE-SEM image of the @NMLDH/NF after cycling

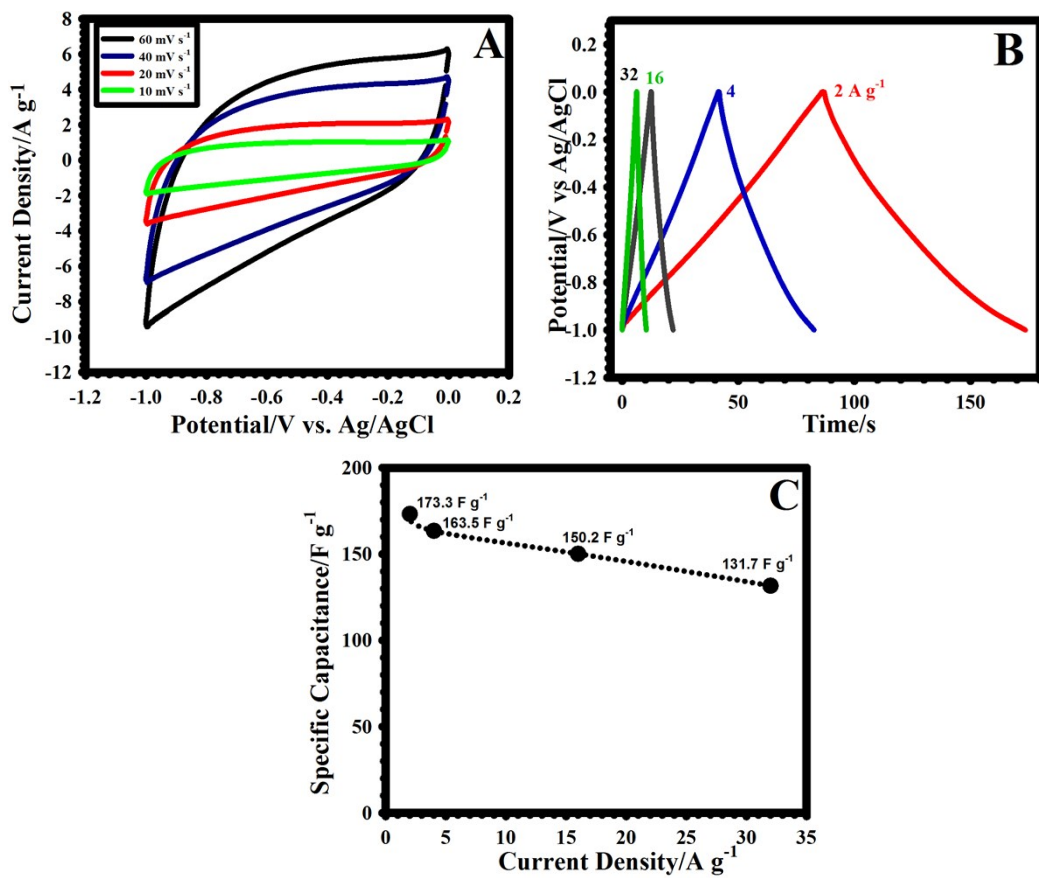

**Fig S10** (A) CV curves of the AC electrode at different sweep rates. (B) GCD profiles of the AC electrode at miscellaneous current densities. (C) Rate capability of the AC electrode.

| Composition                                          | Capacity/capacitance<br>3 and 2 electrodes<br>(mAh g <sup>-1</sup> , F g <sup>-1</sup> )                       | Cycles,<br>retention 2 and<br>3 electrode | ED (W h kg <sup>-1</sup> ) 2<br>Electrode | Reference |
|------------------------------------------------------|----------------------------------------------------------------------------------------------------------------|-------------------------------------------|-------------------------------------------|-----------|
| W <sub>0.4</sub> Mo <sub>0.6</sub> O <sub>3</sub>    | 115.7 mAh g <sup>-1</sup> at 1 A g <sup>-1</sup> (3 E)                                                         | 2000, 82.3% (2 E)                         | 20.2                                      | 1         |
| T-Nb <sub>2</sub> O <sub>5</sub> @Ni <sub>2</sub> P  | 105 mAh g <sup>-1</sup> at 1 A g <sup>-1</sup> (3 E)                                                           | 5000, 90% (2 E)                           | 30.2                                      | 2         |
| Co <sub>3</sub> O <sub>4</sub>                       | 209 mAh g <sup>-1</sup> at 1 A g <sup>-1</sup> (3 E)                                                           | 3000, 90 (3 E)                            | 41.1                                      | 3         |
| SDBS-Ni <sub>2</sub> Co <sub>1</sub> PO <sub>4</sub> | 191.6 mAh g <sup>-1</sup> at 1 A g <sup>-1</sup> (3 E)                                                         | 2000, 77% (3 E)<br>2000, 76% (2 E)        | 36.5                                      | 4         |
| Ni <sub>2</sub> P-CNFs                               | 145 mAh g <sup>-1</sup> at 1 A g <sup>-1</sup> (3 E)                                                           | 6000, 88% (2 E)                           | 42                                        | 5         |
| Co <sub>3</sub> O <sub>4</sub> /Co(OH) <sub>2</sub>  | 184.9 mAh g <sup>-1</sup> at 1 A g <sup>-1</sup> (3 E)                                                         | 5000, 90% (3 E)<br>5000, 91% (2 E)        | 37.6                                      | 6         |
| NiCo <sub>2</sub> O <sub>4</sub>                     | 130 mAh g <sup>-1</sup> at .63 A g <sup>-1</sup> (3 E)                                                         | 100, 100 (3 E)                            | 16.6                                      | 7         |
| ZnCo <sub>2</sub> O <sub>4</sub>                     | 78.89 at 1 A g <sup>-1</sup> (3 E)<br>34.7 at .2 A g <sup>-1</sup> (2 E)                                       |                                           | 27.78                                     | 8         |
| NCSe@NMLDH/NF                                        | 401.7 mAh g <sup>-1</sup> at 2 A g <sup>-1</sup> (3 E)<br>132.2 F g <sup>-1</sup> at 1 A g <sup>-1</sup> (2 E) | 10000, 96.8 (3 E)<br>10000, 91.3 (2 E)    | 47                                        | This work |

**Table S1.** Comparison of the electrochemical performance of NCSe@NMLDH/NF electrode in three and two electrode systems with other previously reported electrodes.

## References

- 1 H. Peng, S. Cui, X. Xie, G. Wei, K. Sun, G. Ma and Z. Lei, *Electrochim. Acta* 2019, **322**, 134759.
- 2 F. Wang, H. Lei, H. Peng, J. Zhou, R. Zhao, J. Liang, G. Ma and Z. Lei, *Electrochim. Acta* 2019, **325**, 134934.
- 3 L. Zhang, Y. Zhang, S. Huang, Y. Yuan, H. Li, Z. Jin, J. Wu, Q. Liao, L. Hu, J. Lu, S. Ruan and Y.-J. Zeng, *Electrochim. Acta* 2018, **281**, 189-197.
- 4 X. Zhang, N. Shang, S. Gao, C. Wang, Y. Gao and Z. Wang, *Appl. Surf. Sci.* 2019, **483**, 529-535.
- 5 H. Peng, J. Zhou, Z. Chen, R. Zhao, J. Liang, F. Wang, G. Ma and Z. Lei, *J. Alloys Compd.* 2019, **797**, 1095-1105.
- 6 G. Lee and J. Jang, *J. Power Sources* 2019, **423**, 115-124.
- 7 Y. Yuan, Y. Lu, B.-E. Jia, H. Tang, L. Chen, Y.-J. Zeng, Y. Hou, Q. Zhang, Q. He, J. Leng, Z. Ye and J. Lu, *Nano-Micro Lett.* 2019, **42**, 2-12.



8 Y. Shang, T. Xie, C. Ma, L. Su, Y. Gai, J. Liu and L. Gong, *Electrochim. Acta* 2018, **286**, 103-113.
